# Supplementary material for: Atomic insights into the interaction of N2, CO2, NH3, NO, and NO2 gas molecules with Zn2(V, Nb, Ta)N3 ternary nitride monolayers
Source: Royal Society of Chemistry journal article supplement (doi:10.1039/d4cp01225a), 2024-01-01
Supplement: d4cp01225a1.pdf [file d4cp01225a1.pdf]

**Supporting Information**

**for**

**Atomic Insights into the Interaction of N<sub>2</sub>, CO<sub>2</sub>, NH<sub>3</sub>, NO, and  
NO<sub>2</sub> Gas Molecules with the Zn<sub>2</sub>(V, Nb, Ta)N<sub>3</sub>**

**Ternary Nitride Monolayers**

Andrey A. Kistanov\*

*The Laboratory of Metals and Alloys Under Extreme Impacts, Ufa University of Science and  
Technology, Ufa 450076, Russia*

\*Correspondence: andrei.kistanov.ufa@gmail.com;

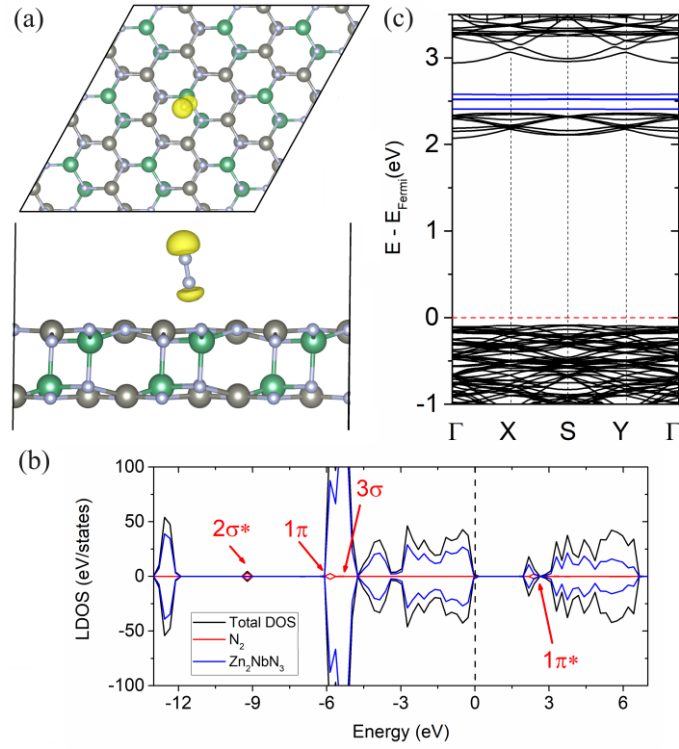

**Figure S1.** (a) The top and side views of the lowest-energy configuration combined with the ELF plots (the isosurface level of 0.75 is adopted here) for the  $\text{Zn}_2\text{NbN}_3$  monolayer adsorbed with the  $\text{N}_2$  molecule. (b) The total DOS (black line) and LDOS (red and blue lines) of the  $\text{Zn}_2\text{NbN}_3$  monolayer adsorbed with the  $\text{N}_2$  molecule. The vertical black dashed line shows the Fermi level. (c) The band structure of the  $\text{Zn}_2\text{NbN}_3$  monolayer adsorbed with the  $\text{N}_2$  molecule. The horizontal red dashed line shows the Fermi level.

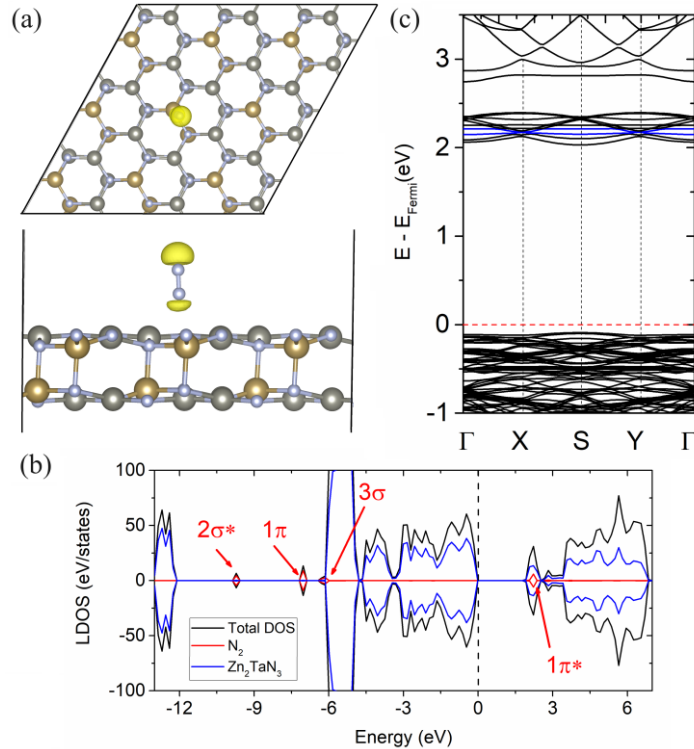

**Figure S2.** (a) The top and side views of the lowest-energy configuration combined with the ELF plots (the isosurface level of 0.75 is adopted here) for the  $\text{Zn}_2\text{TaN}_3$  monolayer adsorbed with the  $\text{N}_2$  molecule. (b) The total DOS (black line) and LDOS (red and blue lines) of the  $\text{Zn}_2\text{TaN}_3$  monolayer adsorbed with the  $\text{N}_2$  molecule. The vertical black dashed line shows the Fermi level. (c) The band structure of the  $\text{Zn}_2\text{TaN}_3$  monolayer adsorbed with the  $\text{N}_2$  molecule. The horizontal red dashed line shows the Fermi level.

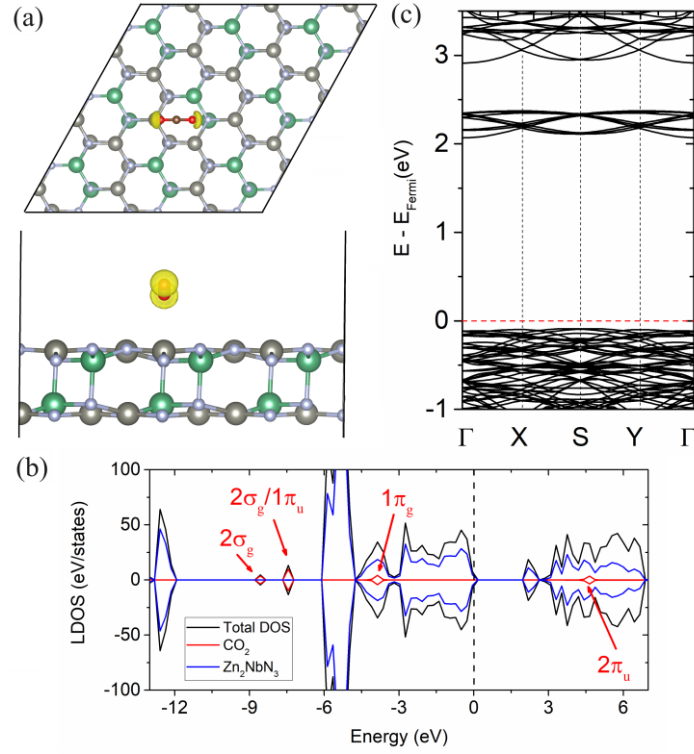

**Figure S3.** (a) The top and side views of the lowest-energy configuration combined with the ELF plots (the isosurface level of 0.75 is adopted here) for the  $\text{Zn}_2\text{NbN}_3$  monolayer adsorbed with the  $\text{CO}_2$  molecule. (b) The total DOS (black line) and LDOS (red and blue lines) of the  $\text{Zn}_2\text{NbN}_3$  monolayer adsorbed with the  $\text{CO}_2$  molecule. The vertical black dashed line shows the Fermi level. (c) The band structure of the  $\text{Zn}_2\text{NbN}_3$  monolayer adsorbed with the  $\text{CO}_2$  molecule. The horizontal red dashed line shows the Fermi level.

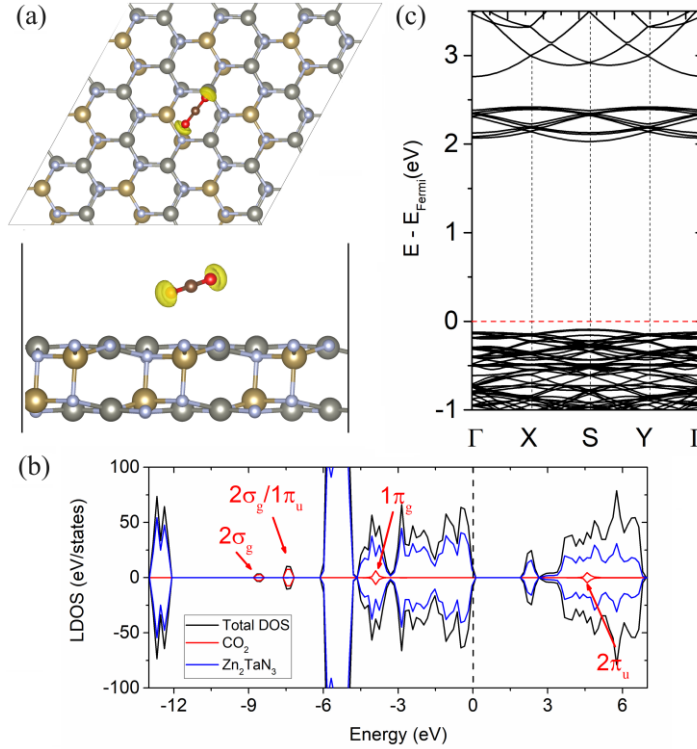

**Figure S4.** (a) The top and side views of the lowest-energy configuration combined with the ELF plots (the isosurface level of 0.75 is adopted here) for the  $\text{Zn}_2\text{TaN}_3$  monolayer adsorbed with the  $\text{CO}_2$  molecule. (b) The total DOS (black line) and LDOS (red and blue lines) of the  $\text{Zn}_2\text{TaN}_3$  monolayer adsorbed with the  $\text{CO}_2$  molecule. The vertical black dashed line shows the Fermi level. (c) The band structure of the  $\text{Zn}_2\text{TaN}_3$  monolayer adsorbed with the  $\text{CO}_2$  molecule. The horizontal red dashed line shows the Fermi level.

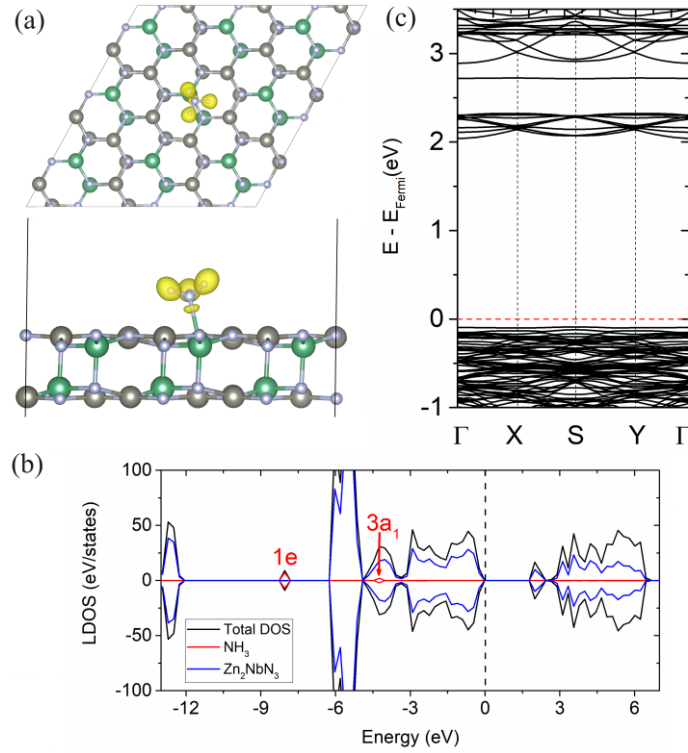

**Figure S5.** (a) The top and side views of the lowest-energy configuration combined with the ELF plots (the isosurface level of 0.75 is adopted here) for the  $\text{Zn}_2\text{NbN}_3$  monolayer adsorbed with the  $\text{NH}_3$  molecule. (b) The total DOS (black line) and LDOS (red and blue lines) of the  $\text{Zn}_2\text{NbN}_3$  monolayer adsorbed with the  $\text{NH}_3$  molecule. The vertical black dashed line shows the Fermi level. (c) The band structure of the  $\text{Zn}_2\text{NbN}_3$  monolayer adsorbed with the  $\text{NH}_3$  molecule. The horizontal red dashed line shows the Fermi level.

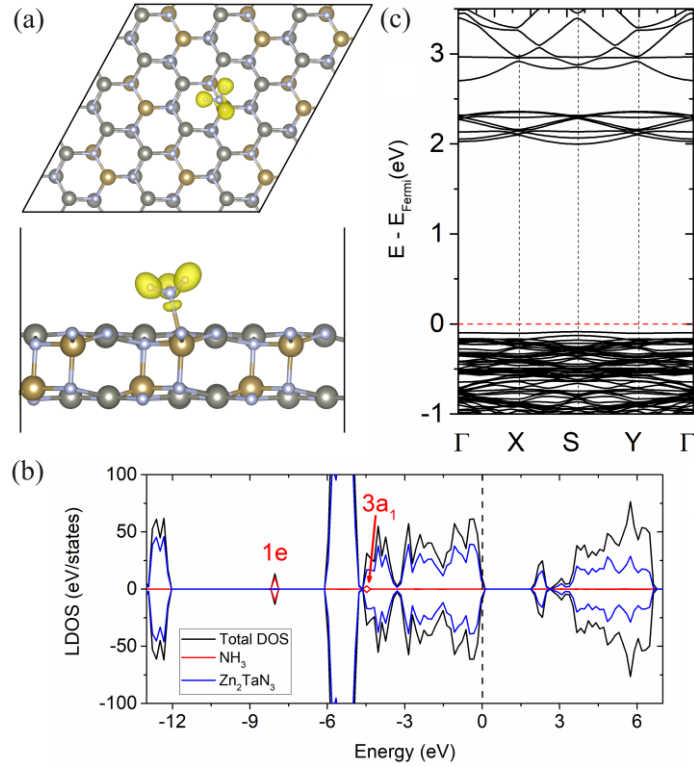

**Figure S6.** (a) The top and side views of the lowest-energy configuration combined with the ELF plots (the isosurface level of 0.75 is adopted here) for the  $\text{Zn}_2\text{TaN}_3$  monolayer adsorbed with the  $\text{NH}_3$  molecule. (b) The total DOS (black line) and LDOS (red and blue lines) of the  $\text{Zn}_2\text{TaN}_3$  monolayer adsorbed with the  $\text{NH}_3$  molecule. The vertical black dashed line shows the Fermi level. (c) The band structure of the  $\text{Zn}_2\text{TaN}_3$  monolayer adsorbed with the  $\text{NH}_3$  molecule. The horizontal red dashed line shows the Fermi level.

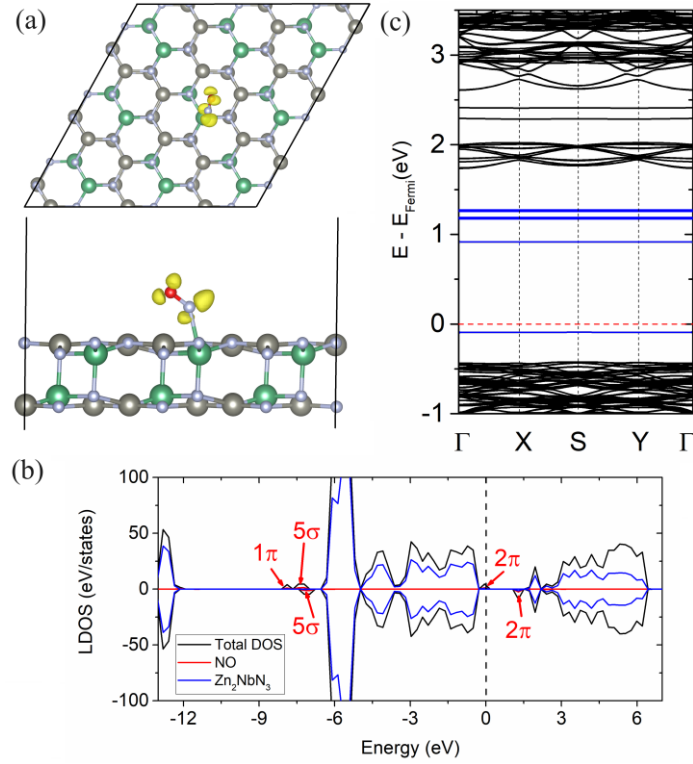

**Figure S7.** (a) The top and side views of the lowest-energy configuration combined with the ELF plots (the isosurface level of 0.75 is adopted here) for the  $\text{Zn}_2\text{NbN}_3$  monolayer adsorbed with the NO molecule. (b) The total DOS (black line) and LDOS (red and blue lines) of the  $\text{Zn}_2\text{NbN}_3$  monolayer adsorbed with the NO molecule. The vertical black dashed line shows the Fermi level. (c) The band structure of the  $\text{Zn}_2\text{NbN}_3$  monolayer adsorbed with the NO molecule. The horizontal red dashed line shows the Fermi level.

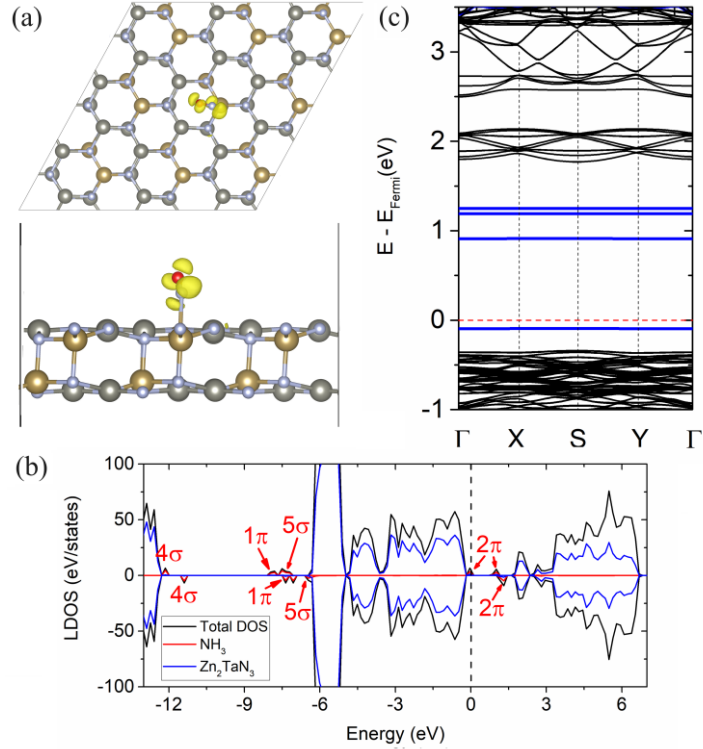

**Figure S8.** (a) The top and side views of the lowest-energy configuration combined with the ELF plots (the isosurface level of 0.75 is adopted here) for the  $\text{Zn}_2\text{TaN}_3$  monolayer adsorbed with the NO molecule. (b) The total DOS (black line) and LDOS (red and blue lines) of the  $\text{Zn}_2\text{TaN}_3$  monolayer adsorbed with the NO molecule. The vertical black dashed line shows the Fermi level. (c) The band structure of the  $\text{Zn}_2\text{TaN}_3$  monolayer adsorbed with the NO molecule. The horizontal red dashed line shows the Fermi level.

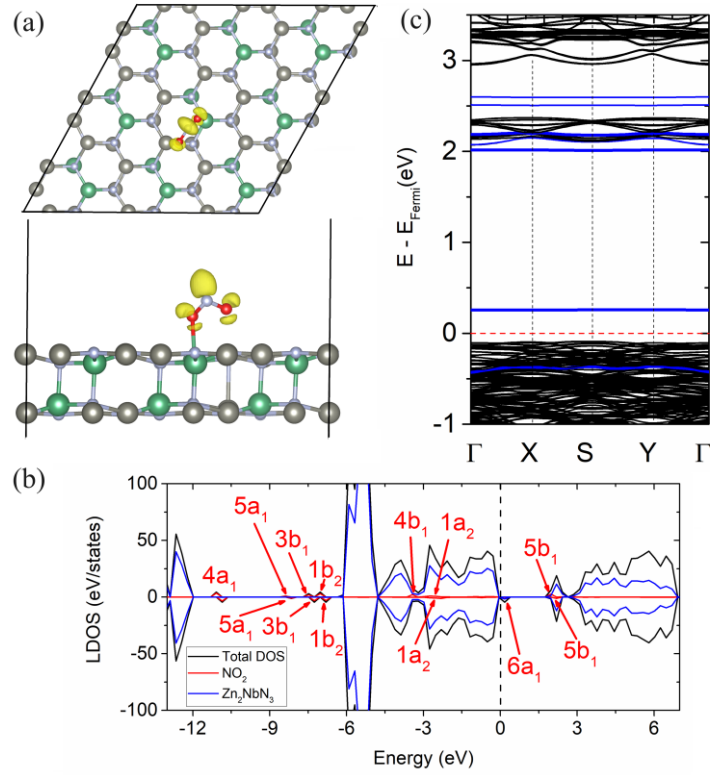

**Figure S9.** (a) The top and side views of the lowest-energy configuration combined with the ELF plots (the isosurface level of 0.75 is adopted here) for the  $\text{Zn}_2\text{NbN}_3$  monolayer adsorbed with the  $\text{NO}_2$  molecule. (b) The total DOS (black line) and LDOS (red and blue lines) of the  $\text{Zn}_2\text{NbN}_3$  monolayer adsorbed with the  $\text{NO}_2$  molecule. The vertical black dashed line shows the Fermi level. (c) The band structure of the  $\text{Zn}_2\text{NbN}_3$  monolayer adsorbed with the  $\text{NO}_2$  molecule. The horizontal red dashed line shows the Fermi level.

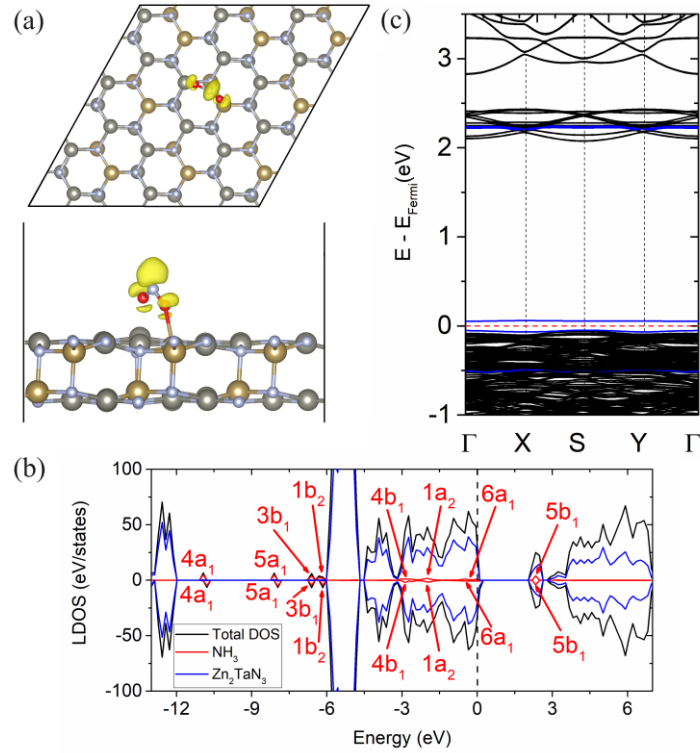

**Figure S10.** (a) The top and side views of the lowest-energy configuration combined with the ELF plots (the isosurface level of 0.75 is adopted here) for the  $\text{Zn}_2\text{TaN}_3$  monolayer adsorbed with the  $\text{NO}_2$  molecule. (b) The total DOS (black line) and LDOS (red and blue lines) of the  $\text{Zn}_2\text{TaN}_3$  monolayer adsorbed with the  $\text{NO}_2$  molecule. The vertical black dashed line shows the Fermi level. (c) The band structure of the  $\text{Zn}_2\text{TaN}_3$  monolayer adsorbed with the  $\text{NO}_2$  molecule. The horizontal red dashed line shows the Fermi level.

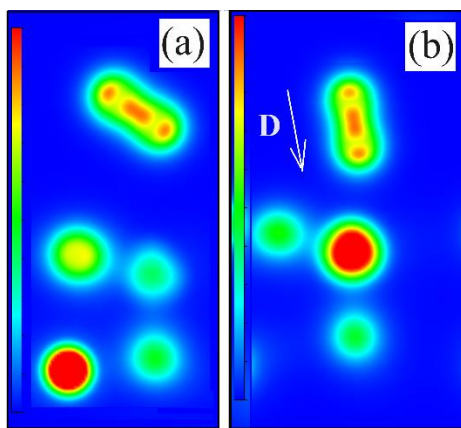

**Figure S11.** The ELF for the  $\text{N}_2$  on  $\text{Zn}_2\text{VN}_3$  (a) and  $\text{Zn}_2\text{NbN}_3$  or  $\text{Zn}_2\text{Taen}_3$  (b) monolayers. D denotes dipole moment.
